# Supplementary material for: Efficacy and Safety of Doubly-Regulated Vaccinia Virus in a Mouse Xenograft Model of Multiple Myeloma
Source: PubMed Central journal article supplement — Mol Ther Oncolytics. 2017 Jul 22;6:57–68. doi: 10.1016/j.omto.2017.07.001 (PMC5545772; doi:10.1016/j.omto.2017.07.001), 2017-07-22
Supplement: mmc1.pdf [file mmc1.pdf]

**OMTO, Volume 6**

**Supplemental Information**

**Efficacy and Safety of Doubly-Regulated**

**Vaccinia Virus in a Mouse Xenograft**

**Model of Multiple Myeloma**

**Muneyoshi Futami, Kota Sato, Kanji Miyazaki, Kenshi Suzuki, Takafumi Nakamura, and Arinobu Tojo**

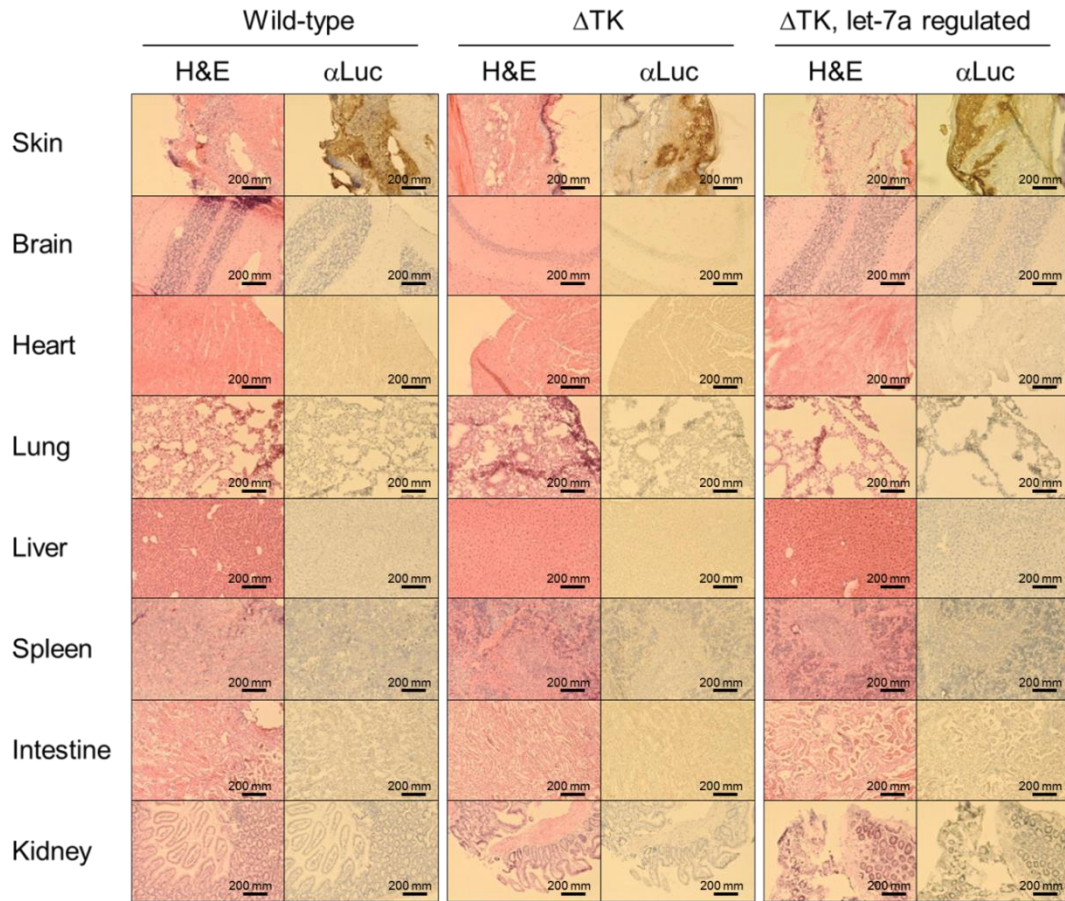**Figure S1**

RPMI8226-bearing SCID mice were infected VVs (wild-type,  $\Delta$ TK, and  $\Delta$ TK, let-7a), and tissue samples were removed 28 days after infection. Immunostaining for firefly luciferase was performed on frozen sections following the manufacturer's instructions using an anti-firefly luciferase antibody (ab21176, Abcam, Cambridge, MA, USA).

## Supplemental Materials and Methods

### Plasmid Construction

Oligonucleotide pairs containing two copies of completed or mutated complementary target sequences for either miR-10a or miR-15a, plus the *EcoRI* site were annealed and subcloned into the pmirGLO vector (Promega) at the corresponding restriction sites *NheI* and *XhoI*, resulting in pmirGLO-miR-10a $\times$ 2 or pmirGLO-miR-10a-mut $\times$ 2, pmirGLO-miR-15a $\times$ 2 or pmirGLO-miR-15a-mut $\times$ 2, respectively.

#### miR10a-SENSE1

5'-CTAGCCACAAATTCGGATCTACAGGGTAAACGATCGCACAAATTCGGATCTACAGGGTAAAG AATCC-3',

#### miR10a-ANTISENSE1

5'-TCGAGGAATTCCTTACCCTGTAGATCCGAATTTGTGCGATCGTTTACCCTGTAGATCCGAATT TGTGG-3',

#### miR10a-mut-SENSE1

5'-CTAGCCATAAGTTTGGTTCAACTGGCTGAACGATCGCATAAGTTTGGTTCAACTGGCTGAAGA ATTCC-3',

#### miR10a-mut-ANTISENSE1

5'-TCGAGGAATTCCTCAGCCAGTTGAACCAAACCTTATGCGATCGTTCAGCCAGTTGAACCAAACCT TATGG-3',

#### miR15a-SENSE1

5'-CTAGCCACAAACCATTATGTGCTGCTAAACGATCGCACAAACCATTATGTGCTGCTAAAGAA TTCC-3',

#### miR15a-ANTISENSE1

5'-TCGAGGAATTCCTTAGCAGCACATAATGGTTTGTGCGATCGTTTAGCAGCACATAATGGTTTG TGG-3',

#### miR15a-mut-SENSE1

5'-CTAGCCATAAGCCTTTGTGCGCAGCAAACGATCGCATAAGCCTTTGTGCGCAGCAAAGAA TTCC-3',

#### miR15a-mut-ANTISENSE1

5'-TCGAGGAATTCCTTTGCTGCGCACAAAGGCTTATGCGATCGTTTTGCTGCGCACAAAGGCTTA TGG-3'.

Another pairs containing two copies of completed or mutated complementary target sequences for either miR-10a or miR-15a plus the *AgeI* site were annealed and cloned into either pmirGLO-miR-10a $\times$ 2 or pmirGLO-miR-10a-mut $\times$ 2, pmirGLO-miR-15a $\times$ 2 or pmirGLO-miR-15a-mut $\times$ 2 at the corresponding restriction sites *EcoRI* and *XbaI*, resulting in pmirGLO-miR-10a $\times$ 4 or pmirGLO-miR-10a-mut $\times$ 4, pmirGLO-miR-15a $\times$ 4 or pmirGLO-miR-15a-mut $\times$ 4, respectively.

#### miR10a-SENSE2

5'-AATTCCACAAATTCGGATCTACAGGGTAAACATATGCACAAATTCGGATCTACAGGGTAAAA CCGTT-3',

#### miR10a-ANTISENSE2

5'-CTAGAACCGGTTTTACCCTGTAGATCCGAATTTGTGCATATGTTTACCCTGTAGATCCGAATT  
TGTGG-3',

miR10a-mut-SENSE2

5'-AATTCCATAAGTTTGGTTCAACTGGCTGAACATATGCATAAGTTTGGTTCAACTGGCTGAAAC  
CGGTT-3',

miR10a-mut-ANTISENSE2

5'-CTAGAACCGGTTTCAGCCAGTTGAACCAAACCTTATGCATATGTTTCAGCCAGTTGAACCAAACCT  
TATGG-3',

miR15a-SENSE2

5'-AATTCCACAAACCATTATGTGCTGCTAAACATATGCACAAACCATTATGTGCTGCTAAAACCG  
GTT-3',

miR15a-ANTISENSE2

5'-CTAGAACCGGTTTTAGCAGCACATAATGGTTTGTGCATATGTTTAGCAGCACATAATGGTTTG  
TGG-3',

miR15a-mut-SENSE2

5'-AATTCCATAAGCCTTTGTGCGCAGCAAAACATATGCATAAGCCTTTGTGCGCAGCAAAAACC  
GGTT-3',

miR15a-mut-ANTISENSE2

5'-CTAGAACCGGTTTTGCTGCGCACAAAGGCTTATGCATATGTTTTGCTGCGCACAAAGGCTTA  
TGG-3'.

To generate plasmid vectors in which B5R as well as green fluorescent protein (GFP) are regulated by either miR-10a or miR-15a, plasmid vectors pmrGLO-miR-10a×4 or pmirGLO-miR-10a-mut×4, pmrGLO-miR-15a×4 or pmirGLO-miR-15a-mut×4, were digested with *NheI* and *AgeI*, and the fragment containing four copies of completed or mutated complementary target sequences for either miR-10a or miR-15a were cloned into the pTN-B5Rgfp at the corresponding restriction sites *NheI* and *AgeI*, resulting in pTN-B5Rgfp-miR-10a×4 or pTN-B5Rgfp-miR-10a-mut×4, pTN-B5Rgfp-miR-15a×4 or pTN-B5Rgfp-miR-15a-mut×4, respectively. Plasmid vectors in which B5Rgfp is regulated by let-7a (pTN-B5Rgfp-let-7a×4 or pTN-B5Rgfp-let-7a-mut×4) were generated using the same method as described previously<sup>1</sup>.

### Supplemental References

1. Hikichi, M, Kidokoro, M, Haraguchi, T, Iba, H, Shida, H, Tahara, H, *et al.* (2011). MicroRNA regulation of glycoprotein B5R in oncolytic vaccinia virus reduces viral pathogenicity without impairing its antitumor efficacy. *Molecular therapy : the journal of the American Society of Gene Therapy* **19**: 1107-1115.
